# Supplementary material for: Genome-wide DNA methylation patterns in LSH mutant reveals de-repression of repeat elements and redundant epigenetic silencing pathways
Source: HighWire-hosted journal article supplement (doi:10.1101/gr.172015.114), 2014-08-28
Supplement: Table_S1.xlsx [file Table_S1.xlsx]

## Sheet: Genes Upregulated
Genes with greater than twofold expression in KO MEFs							Annotation Cluster 1	Enrichment Score: 5.5707437815204495
compared to WT MEFs							Category	Term	Count	%	PValue	Genes	List Total	Pop Hits	Pop Total	Fold Enrichment	Bonferroni	Benjamini	FDR
in two independent biologic replica							GOTERM_BP_FAT	GO:0007156~homophilic cell adhesion	12	4.74308	1.26695e-07	12936, 12937, 12939, 353236, 12943, 353234, 12941, 353235, 192161, 192163, 19713, 93890, 116731, 93892, 93893, 93885, 93888, 93889, 93886, 93887	161	117	13588	8.65616	0.000136442	0.000136442	0.000202067
Gene ID	Gene Symbol						GOTERM_BP_FAT	GO:0016337~cell-cell adhesion	14	5.5336	4.31602e-06	12936, 12937, 12939, 353236, 12943, 353234, 353235, 12941, 192161, 192163, 19713, 93890, 116731, 93892, 93893, 93885, 56644, 93888, 75677, 93889, 93886, 93887	161	236	13588	5.00663	0.00463757	0.00232148	0.00688342
243978	Mrgprx2						GOTERM_BP_FAT	GO:0007155~cell adhesion	21	8.3004	9.63638e-06	22403, 12936, 12937, 12939, 353236, 18488, 353234, 353235, 93890, 93892, 93893, 93970, 16636, 114332, 12943, 108078, 12941, 213945, 192161, 192163, 19713, 116731, 93885, 56644, 93888, 93889, 75677, 93886, 93887	161	561	13588	3.15927	0.0103248	0.0034535	0.015368
77673	Defb41						GOTERM_BP_FAT	GO:0022610~biological adhesion	21	8.3004	9.89162e-06	22403, 12936, 12937, 12939, 353236, 18488, 353234, 353235, 93890, 93892, 93893, 93970, 16636, 114332, 12943, 108078, 12941, 213945, 192161, 192163, 19713, 116731, 93885, 56644, 93888, 93889, 75677, 93886, 93887	161	562	13588	3.15364	0.0105968	0.00265979	0.015775
67473	Slc47a1
16636	Klra5						Annotation Cluster 2	Enrichment Score: 4.837898823169001
257963	Olfr857						Category	Term	Count	%	PValue	Genes	List Total	Pop Hits	Pop Total	Fold Enrichment	Bonferroni	Benjamini	FDR
353235	Pcdha8						GOTERM_MF_FAT	GO:0004867~serine-type endopeptidase inhibitor activity	12	4.74308	3.89328e-07	20703, 213945, 97848, 20708, 380839, 20701, 217847, 93806, 20710, 20726, 20725, 546546	179	115	13288	7.74622	0.000128081	0.000128081	0.000527574
637873	Vmn2r61						GOTERM_MF_FAT	GO:0004866~endopeptidase inhibitor activity	12	4.74308	1.06882e-05	20703, 213945, 97848, 20708, 380839, 20701, 217847, 93806, 20710, 20726, 20725, 546546	179	161	13288	5.53302	0.00351027	0.00175668	0.0144826
259021	Olfr1054						GOTERM_MF_FAT	GO:0030414~peptidase inhibitor activity	12	4.74308	2.4707e-05	20703, 213945, 97848, 20708, 380839, 20701, 217847, 93806, 20710, 20726, 20725, 546546	179	176	13288	5.06145	0.00809574	0.0027059	0.033475
83564	Nlrp4c						GOTERM_MF_FAT	GO:0004857~enzyme inhibitor activity	12	4.74308	0.000432878	20703, 213945, 97848, 20708, 380839, 20701, 217847, 93806, 20710, 20726, 20725, 546546	179	243	13288	3.66591	0.132767	0.0280875	0.584998
56519	Defb4
97848	Serpinb6c						Annotation Cluster 3	Enrichment Score: 2.4471390404318067
435337	Gm5662						Category	Term	Count	%	PValue	Genes	List Total	Pop Hits	Pop Total	Fold Enrichment	Bonferroni	Benjamini	FDR
116731	Pcdha1						GOTERM_BP_FAT	GO:0042742~defense response to bacterium	7	2.7668	0.00172862	17195, 66438, 56519, 20737, 77673, 13214, 195046	161	108	13588	5.47021	0.844846	0.266961	2.72165
21925	Tnnc2						GOTERM_BP_FAT	GO:0006952~defense response	14	5.5336	0.00247081	15953, 20701, 66438, 56519, 20737, 108078, 13214, 195046, 17195, 13488, 20307, 56644, 77673, 16193	161	448	13588	2.63742	0.930355	0.316563	3.86875
353234	Pcdha2						GOTERM_BP_FAT	GO:0009617~response to bacterium	7	2.7668	0.010667	17195, 66438, 56519, 20737, 77673, 13214, 195046	161	157	13588	3.76295	0.99999	0.536991	15.7215
66438	Hamp2
258706	Olfr43
93806	Serpinb9g
12623	Ces1g
170771	Khdrbs2
20710	Serpinb9e
241770	Rims4
12937	Pcdha6
666747	Trim43b
381485	Trim55
380701	Slc47a2
113855	Vmn1r40
113848	Vmn1r42
15235	Mst1
67405	Nts
623279	Dok6
20726	Serpinb9d
545886	Gm5886
17195	Mbl2
353236	Pcdhac1
69332	Lelp1
71601	Ceacam20
73730	Lce1l
16178	Il1r2
258440	Olfr1317
20703	Serpina1d
14711	Gnmt
15552	Htr1d
56185	Hao2
15497	Hsd3b6
13214	Defb1
74685	4930451C15Rik
665268	1600029O15Rik
246709	Rgs13
71096	Sntg1
17232	Mcpt9
12919	Crhbp
239167	D930020E02Rik
223337	Ugt3a2
12922	Crhr2
20701	Serpina1b
271209	Rp1l1
75766	Tm7sf4
382074	Foxr1
626058	E330020D12Rik
236312	Pyhin1
666279	Dspp
621430	Vmn2r79
73703	Dppa2
327799	Usp44
207215	Fbxo40
99663	Clca6
12939	Pcdha7
72082	Cyp2c55
15492	Hsd3b1
110115	Cyp11b1
12943	Pcdha10
269346	Slc28a2
209588	Sectm1a
28240	Trpm2
381417	Gm14085
66773	Gm17019
76294	Asb5
72716	2810047C21Rik1
20307	Ccl8
17384	Mmp10
215028	Prl3d2
114666	Krtap5-5
195046	Nlrp1a
74409	Hyal6
232714	Mgam
217847	Serpina10
50994	Mtag2
192163	Pcdha3
54200	Sult2b1
381339	Tmem182
75305	Ankrd53
229927	Clca4
239420	Csmd3
435766	Tnni3k
17883	Myh3
20739	Spna1
70337	Iyd
227357	Espnl
381058	Unc93a
59006	Myoz2
58860	Adamdec1
17394	Mmp8
93886	Pcdhb15
71797	Chst13
76960	Bcas1
245038	Dclk3
80797	Clca2
214639	4930486L24Rik
15439	Hp
12299	Cacng1
68172	Rpl39l
246317	Neto1
228139	P2rx3
74558	Gvin1
12936	Pcdha4
231044	Gbx1
12763	Cmah
114332	Lyve1
74376	Myo18b
545471	Zfp345
18488	Cntn3
73690	Glipr1
231134	Dok7
243538	Ccdc37
268807	Klhl38
66139	Tmem8c
244237	Tnfrsf26
83996	Mmp1b
213068	Tmem71
56631	Trim17
20557	Slfn3
18231	Nxph1
320092	E030003E18Rik
207728	Pde2a
269295	Rtn4rl2
170732	Trhr2
15371	Hmx1
140795	P2ry14
246728	Oas2
93885	Pcdhb14
14802	Gria4
19112	Prl8a6
18423	Otx1
22138	Ttn
211739	Vstm2a
26944	Tinag
241489	Pde11a
80901	Cxcr6
93970	Klra18
380839	Serpinb1c
234673	Ces2e
432450	Nkain2
19771	Rlbp1
216343	Tph2
93892	Pcdhb21
93887	Pcdhb16
328967	Arhgef37
382075	Odf3l1
81701	Egfl8
271424	Ip6k3
13488	Drd1a
17075	Epcam
373852	4833422C13Rik
217258	Abca8a
21956	Tnnt2
71898	Apol9b
93893	Pcdhb22
231014	9330182L06Rik
140494	Atp6v0a4
107770	Tm6sf2
15375	Foxa1
12941	Pcdha5
12519	Cd80
434246	Trim72
223672	Apol9a
329324	Syt14
14823	Grm8
11529	Adh7
15464	Hrc
258983	Olfr1260
22353	Vip
69852	Tcf23
382571	Kcnf1
192161	Pcdha9
243653	Clec1a
15950	Ifi203
666060	Frmpd1
14544	Gda
67295	Rab3c
23850	Pappa2
74053	Grip1
74199	Vit
11441	Chrna7
105387	Akr1c14
108078	Olr1
19737	Rgs5
56644	Clec7a
12373	Casq2
20254	Scg2
240873	Tnfsf18
22403	Wisp2
626391	Zfp951
72330	Kbtbd5
19263	Ptprb
16193	Il6
19713	Ret
381622	5031410I06Rik
14468	Gbp1
381308	Mnda
14190	Fgl2
320500	Tmem215
236573	Gbp9
20272	Scn7a
52668	Ifi27l1
242748	Ptchd2
243958	Siglecg
11847	Arg2
67731	Fbxo32
244885	Sh2d7
18491	Pappa
93889	Pcdhb18
13024	Ctla2a
213945	Col28a1
319191	Hist1h2ai
20737	Spn
14254	Flt1
20708	Serpinb6b
17927	Myod1
170947	Myoz3
238564	Mylk4
67642	4930515G01Rik
14472	Gbx2
239849	Cd200r4
74901	Kbtbd11
16439	Itpr2
70598	Filip1
93890	Pcdhb19
94284	Ugt1a6a
70788	Klhl30
58203	Zbp1
212892	Rsph4a
241452	Dhrs9
76933	Ifi27l2a
93888	Pcdhb17
545055	Cma2
110332	4921523A10Rik
20725	Serpinb8
546546	Serpina3h
22152	Tubb3
22437	Xirp1
12870	Cp
99899	Ifi44
14469	Gbp2
100702	Gbp6
15953	Ifi47
78887	Sfi1
72560	Naalad2
75677	Cldn22
94180	Acsbg1
73713	Rbm20
16447	Ivl

## Sheet: Genes Downregulated
Genes with greater than twofold expression in WT MEFs						Annotation Cluster 1	Enrichment Score: 8.5793773243544
compared to KO MEFs						Category	Term	Count	%	PValue	Genes	List Total	Pop Hits	Pop Total	Fold Enrichment	Bonferroni	Benjamini	FDR
in two independent biologic replica						GOTERM_BP_FAT	GO:0006955~immune response	31	12.8099	9.1771e-13	22324, 140497, 12259, 15900, 17079, 20304, 20303, 56619, 17969, 20302, 18733, 17474, 217305, 216799, 21926, 321019, 20310, 69769, 14127, 18987, 56744, 16331, 16176, 56743, 12260, 11433, 17084, 12263, 12518, 17916, 12262	183	471	13588	4.88703	1.23707e-09	1.23707e-09	1.5051e-09
Gene ID	Gene Symbol					GOTERM_BP_FAT	GO:0006954~inflammatory response	18	7.43802	8.86016e-09	12259, 11689, 216799, 21926, 17079, 20310, 268973, 20304, 20303, 16176, 20344, 12260, 192187, 17084, 17969, 12263, 20302, 12262	183	225	13588	5.94011	1.19434e-05	5.97173e-06	1.45312e-05
393082	Mettl7a2					GOTERM_BP_FAT	GO:0009611~response to wounding	21	8.67769	4.13952e-08	12259, 11689, 216799, 21926, 70839, 17079, 20310, 268973, 20304, 20303, 12495, 56744, 16176, 20344, 12260, 192187, 17084, 20302, 12263, 17969, 12262	183	347	13588	4.4936	5.57992e-05	1.39501e-05	6.78906e-05
327956	Vmo1					GOTERM_BP_FAT	GO:0006952~defense response	23	9.50413	1.43019e-07	12259, 11689, 216799, 15900, 21926, 17079, 20310, 14127, 69769, 268973, 20304, 20303, 16176, 20344, 12260, 12273, 192187, 17084, 20302, 12263, 17969, 17916, 12262	183	448	13588	3.81201	0.000192771	3.85572e-05	0.000234559
107753	Lgals2
16147	Ihh					Annotation Cluster 2	Enrichment Score: 5.060186287941322
104582	Rprml					Category	Term	Count	%	PValue	Genes	List Total	Pop Hits	Pop Total	Fold Enrichment	Bonferroni	Benjamini	FDR
66793	Efcab1					GOTERM_BP_FAT	GO:0007155~cell adhesion	23	9.50413	6.06135e-06	108101, 93879, 69524, 67666, 57278, 232370, 54419, 12824, 17136, 13507, 12845, 54003, 16411, 22255, 20344, 12491, 93875, 11501, 93876, 60363, 93877, 192187, 93878	183	561	13588	3.04417	0.00813744	0.000907447	0.00994051
14409	Gabrr2					GOTERM_BP_FAT	GO:0022610~biological adhesion	23	9.50413	6.23553e-06	108101, 93879, 69524, 67666, 57278, 232370, 54419, 12824, 17136, 13507, 12845, 54003, 16411, 22255, 20344, 12491, 93875, 11501, 93876, 60363, 93877, 192187, 93878	183	562	13588	3.03876	0.00837029	0.000840198	0.0102261
74614	4833422F24Rik					GOTERM_BP_FAT	GO:0016337~cell-cell adhesion	14	5.78512	1.74582e-05	93879, 69524, 232370, 54419, 12824, 13507, 22255, 20344, 93875, 93876, 11501, 93877, 60363, 93878	183	236	13588	4.40474	0.0232591	0.00195923	0.0286286
353188	Adam32
54419	Cldn6					Annotation Cluster 3	Enrichment Score: 3.3207977622075227
217217	Asb16					Category	Term	Count	%	PValue	Genes	List Total	Pop Hits	Pop Total	Fold Enrichment	Bonferroni	Benjamini	FDR
14174	Fgf3					GOTERM_BP_FAT	GO:0006935~chemotaxis	12	4.95868	2.26051e-07	20310, 14127, 19354, 12267, 20304, 20303, 56744, 94176, 16176, 12273, 20302, 14293	183	109	13588	8.17446	0.000304671	5.07849e-05	0.000370737
228770	Rspo4					GOTERM_BP_FAT	GO:0042330~taxis	12	4.95868	2.26051e-07	20310, 14127, 19354, 12267, 20304, 20303, 56744, 94176, 16176, 12273, 20302, 14293	183	109	13588	8.17446	0.000304671	5.07849e-05	0.000370737
77717	6030408B16Rik					GOTERM_BP_FAT	GO:0050900~leukocyte migration	7	2.89256	2.14777e-05	20310, 14127, 56744, 16176, 20344, 12273, 21926	183	43	13588	12.0874	0.0285371	0.00222461	0.0352188
27140	Tlx3					GOTERM_BP_FAT	GO:0007626~locomotory behavior	12	4.95868	0.000377941	20310, 14127, 19354, 12267, 20304, 20303, 56744, 94176, 16176, 12273, 20302, 14293	183	239	13588	3.7281	0.399241	0.0239728	0.618045
665205	Gm14327					GOTERM_MF_FAT	GO:0005125~cytokine activity	10	4.13223	0.000429383	20310, 12164, 20304, 20303, 50498, 56744, 14563, 16176, 20302, 21926	167	180	13288	4.42049	0.119754	0.0617859	0.571391
13483	Dpp6					GOTERM_BP_FAT	GO:0060326~cell chemotaxis	5	2.06612	0.000429447	20310, 14127, 56744, 16176, 12273	183	27	13588	13.7503	0.439552	0.0259757	0.701995
13507	Dsc3					GOTERM_BP_FAT	GO:0030595~leukocyte chemotaxis	5	2.06612	0.000429447	20310, 14127, 56744, 16176, 12273	183	27	13588	13.7503	0.439552	0.0259757	0.701995
17136	Mag					GOTERM_MF_FAT	GO:0008009~chemokine activity	5	2.06612	0.00124515	20310, 20304, 20303, 56744, 20302	167	38	13288	10.4696	0.309293	0.116043	1.64864
231602	P2rx2					GOTERM_MF_FAT	GO:0042379~chemokine receptor binding	5	2.06612	0.00137408	20310, 20304, 20303, 56744, 20302	167	39	13288	10.2011	0.335276	0.0970568	1.81791
14403	Gabrd					GOTERM_BP_FAT	GO:0030593~neutrophil chemotaxis	4	1.65289	0.00139965	20310, 14127, 16176, 12273	183	17	13588	17.4709	0.848633	0.0572946	2.27093
224405	Cyyr1					GOTERM_BP_FAT	GO:0007610~behavior	14	5.78512	0.00318483	12267, 231602, 94176, 14293, 20310, 19354, 14127, 20304, 20303, 56744, 16176, 12273, 20302, 14799	183	405	13588	2.56671	0.986431	0.104396	5.09715
72413	Kcnmb2					GOTERM_BP_FAT	GO:0016477~cell migration	10	4.13223	0.0050679	20310, 14127, 56744, 16176, 20344, 12273, 57778, 21926, 17172, 27140	183	240	13588	3.09381	0.998939	0.150467	7.99505
18191	Nrxn3					GOTERM_BP_FAT	GO:0048870~cell motility	10	4.13223	0.0143657	20310, 14127, 56744, 16176, 20344, 12273, 57778, 21926, 17172, 27140	183	284	13588	2.61448	1	0.317817	21.1256
77945	Rpgrip1					GOTERM_BP_FAT	GO:0051674~localization of cell	10	4.13223	0.0143657	20310, 14127, 56744, 16176, 20344, 12273, 57778, 21926, 17172, 27140	183	284	13588	2.61448	1	0.317817	21.1256
71099	Tssk4					GOTERM_BP_FAT	GO:0006928~cell motion	10	4.13223	0.0588472	20310, 14127, 56744, 16176, 20344, 12273, 57778, 21926, 17172, 27140	183	367	13588	2.0232	1	0.649415	63.0163
18987	Pou2f2
109225	Ms4a7					Annotation Cluster 4	Enrichment Score: 3.15847874527454
195236	Pom121l2					Category	Term	Count	%	PValue	Genes	List Total	Pop Hits	Pop Total	Fold Enrichment	Bonferroni	Benjamini	FDR
67119	Ccdc159					GOTERM_BP_FAT	GO:0001775~cell activation	18	7.43802	3.34041e-08	18733, 22324, 94176, 20375, 21926, 70839, 321019, 14127, 18987, 12495, 16411, 56744, 56743, 17060, 16822, 17916, 12518, 74039	183	246	13588	5.43303	4.50277e-05	1.50095e-05	5.47846e-05
16331	Inpp5d					GOTERM_BP_FAT	GO:0045321~leukocyte activation	14	5.78512	7.84066e-06	18733, 22324, 94176, 20375, 321019, 14127, 18987, 16411, 56743, 16822, 17060, 12518, 74039, 17916	183	219	13588	4.74666	0.0105136	0.000960379	0.0128584
93879	Pcdhb8					GOTERM_BP_FAT	GO:0002521~leukocyte differentiation	9	3.71901	0.000648015	18733, 22324, 18987, 94176, 20375, 21926, 74039, 12518, 321019	183	142	13588	4.70607	0.58264	0.0330495	1.0575
12164	Bmp8b					GOTERM_BP_FAT	GO:0046649~lymphocyte activation	10	4.13223	0.00108762	22324, 18987, 16411, 94176, 56743, 20375, 17060, 74039, 12518, 321019	183	191	13588	3.88751	0.769364	0.0477209	1.7689
232196	C87436					GOTERM_BP_FAT	GO:0048534~hemopoietic or lymphoid organ development	12	4.95868	0.00143254	18733, 22324, 18987, 94176, 14174, 20375, 21926, 74039, 12518, 15900, 15163, 321019	183	281	13588	3.17088	0.855206	0.0568773	2.32371
12518	Cd79a					GOTERM_BP_FAT	GO:0030097~hemopoiesis	11	4.54545	0.0020605	18733, 22324, 18987, 94176, 20375, 21926, 74039, 12518, 15900, 15163, 321019	183	251	13588	3.25404	0.937988	0.0785227	3.32625
243755	Slc13a4					GOTERM_BP_FAT	GO:0002520~immune system development	12	4.95868	0.00209337	18733, 22324, 18987, 94176, 14174, 20375, 21926, 74039, 12518, 15900, 15163, 321019	183	295	13588	3.02039	0.940681	0.0775382	3.37846
93877	Pcdhb6					GOTERM_BP_FAT	GO:0042113~B cell activation	6	2.47934	0.00391358	18987, 56743, 17060, 74039, 12518, 321019	183	78	13588	5.71164	0.994937	0.123787	6.22866
68666	Svop					GOTERM_BP_FAT	GO:0030098~lymphocyte differentiation	7	2.89256	0.0042985	22324, 18987, 94176, 20375, 74039, 12518, 321019	183	114	13588	4.55929	0.996993	0.132058	6.82119
627480	Gm6762					GOTERM_BP_FAT	GO:0030183~B cell differentiation	4	1.65289	0.0235463	18987, 74039, 12518, 321019	183	46	13588	6.45664	1	0.409365	32.3479
53314	Batf					GOTERM_BP_FAT	GO:0030099~myeloid cell differentiation	5	2.06612	0.0399743	18733, 20375, 21926, 15900, 15163	183	96	13588	3.86726	1	0.544154	48.7813
212933	Pm20d1
16176	Il1b					Annotation Cluster 5	Enrichment Score: 3.1206745115026266
664849	Gm7367					Category	Term	Count	%	PValue	Genes	List Total	Pop Hits	Pop Total	Fold Enrichment	Bonferroni	Benjamini	FDR
431706	Zfp457					GOTERM_BP_FAT	GO:0002443~leukocyte mediated immunity	11	4.54545	2.95619e-07	18733, 14127, 18987, 12259, 16331, 56743, 12260, 17969, 12263, 17916, 12262	183	89	13588	9.17714	0.000398416	5.69263e-05	0.000484832
320571	Atp8b5					GOTERM_BP_FAT	GO:0002252~immune effector process	12	4.95868	9.82934e-07	18733, 14127, 18987, 12259, 16331, 56743, 12260, 216799, 17969, 12263, 17916, 12262	183	126	13588	7.07156	0.00132412	0.000165611	0.00161206
14912	Nkx6-2					GOTERM_BP_FAT	GO:0019724~B cell mediated immunity	8	3.30579	2.49164e-05	18733, 14127, 18987, 12259, 16331, 12260, 12263, 12262	183	65	13588	9.13863	0.0330299	0.00239625	0.0408565
212937	Tifab					GOTERM_BP_FAT	GO:0002449~lymphocyte mediated immunity	8	3.30579	6.91382e-05	18733, 14127, 18987, 12259, 16331, 12260, 12263, 12262	183	76	13588	7.81593	0.0889901	0.00619417	0.11333
14126	Ms4a2					GOTERM_BP_FAT	GO:0002250~adaptive immune response	8	3.30579	0.000130933	18733, 14127, 18987, 12259, 16331, 12260, 12263, 12262	183	84	13588	7.07156	0.161809	0.00975814	0.214521
52855	Lair1					GOTERM_BP_FAT	GO:0002460~adaptive immune response based on somatic recombination of immune receptors built from immunoglobulin superfamily domains	8	3.30579	0.000130933	18733, 14127, 18987, 12259, 16331, 12260, 12263, 12262	183	84	13588	7.07156	0.161809	0.00975814	0.214521
229588	Gm128					GOTERM_BP_FAT	GO:0002253~activation of immune response	8	3.30579	0.000151879	14127, 12259, 56743, 12260, 12263, 74039, 12518, 12262	183	86	13588	6.9071	0.185147	0.0107184	0.248799
56744	Pf4					GOTERM_BP_FAT	GO:0016064~immunoglobulin mediated immune response	7	2.89256	0.000191816	14127, 18987, 12259, 16331, 12260, 12263, 12262	183	63	13588	8.25015	0.227863	0.0128464	0.314126
210198	Gprc6a					GOTERM_BP_FAT	GO:0002684~positive regulation of immune system process	11	4.54545	0.000458453	12493, 14127, 12259, 16331, 20344, 56743, 12260, 12263, 74039, 12518, 12262	183	206	13588	3.96488	0.461052	0.0265175	0.749241
18599	Padi1					GOTERM_BP_FAT	GO:0006959~humoral immune response	6	2.47934	0.000758567	12259, 12260, 12263, 21926, 12262, 321019	183	54	13588	8.25015	0.640462	0.0371778	1.23685
320162	Ccdc45					GOTERM_BP_FAT	GO:0048584~positive regulation of response to stimulus	10	4.13223	0.000901831	14127, 12259, 16176, 56743, 12260, 12263, 21926, 74039, 12518, 12262	183	186	13588	3.99201	0.703651	0.0425065	1.46883
57344	As3mt					GOTERM_BP_FAT	GO:0050778~positive regulation of immune response	8	3.30579	0.00235932	14127, 12259, 56743, 12260, 12263, 74039, 12518, 12262	183	136	13588	4.36773	0.958586	0.0846493	3.79992
73032	Ttc9b					GOTERM_BP_FAT	GO:0016485~protein processing	6	2.47934	0.00716774	13363, 12259, 12260, 16147, 12263, 12262	183	90	13588	4.95009	0.999939	0.20189	11.1285
218518	Marveld2					GOTERM_BP_FAT	GO:0006958~complement activation, classical pathway	4	1.65289	0.00735643	12259, 12260, 12263, 12262	183	30	13588	9.90018	0.999952	0.202447	11.4051
93878	Pcdhb7					GOTERM_BP_FAT	GO:0051604~protein maturation	6	2.47934	0.0093521	13363, 12259, 12260, 16147, 12263, 12262	183	96	13588	4.64071	0.999997	0.23623	14.2815
12984	Csf2rb2					GOTERM_BP_FAT	GO:0002455~humoral immune response mediated by circulating immunoglobulin	4	1.65289	0.0112949	12259, 12260, 12263, 12262	183	35	13588	8.48587	1	0.273126	16.9973
53420	Syt5					GOTERM_BP_FAT	GO:0006956~complement activation	4	1.65289	0.0122024	12259, 12260, 12263, 12262	183	36	13588	8.25015	1	0.28663	18.238
69640	Fam83g					GOTERM_BP_FAT	GO:0002541~activation of plasma proteins involved in acute inflammatory response	4	1.65289	0.0122024	12259, 12260, 12263, 12262	183	36	13588	8.25015	1	0.28663	18.238
217305	Cd300ld					GOTERM_BP_FAT	GO:0045087~innate immune response	6	2.47934	0.0144733	17079, 69769, 12259, 12260, 12263, 12262	183	107	13588	4.16363	1	0.314724	21.2667
170442	Bbox1					GOTERM_BP_FAT	GO:0002526~acute inflammatory response	5	2.06612	0.0233149	12259, 16176, 12260, 12263, 12262	183	81	13588	4.58342	1	0.411402	32.0846
16691	Krt8					GOTERM_BP_FAT	GO:0051605~protein maturation by peptide bond cleavage	4	1.65289	0.0564631	12259, 12260, 12263, 12262	183	65	13588	4.56931	1	0.638493	61.4494
217593	Slc25a21
13395	Dlx5					Annotation Cluster 6	Enrichment Score: 2.370113138049529
246177	Myo1g					Category	Term	Count	%	PValue	Genes	List Total	Pop Hits	Pop Total	Fold Enrichment	Bonferroni	Benjamini	FDR
382062	AB124611					GOTERM_BP_FAT	GO:0002253~activation of immune response	8	3.30579	0.000151879	14127, 12259, 56743, 12260, 12263, 74039, 12518, 12262	183	86	13588	6.9071	0.185147	0.0107184	0.248799
22255	Uncx					GOTERM_CC_FAT	GO:0045121~membrane raft	8	3.30579	0.000165209	14126, 14127, 16890, 12491, 56743, 21926, 74039, 12518	173	85	12504	6.80258	0.0304243	0.0153296	0.2046
69315	1700001L19Rik					GOTERM_BP_FAT	GO:0002684~positive regulation of immune system process	11	4.54545	0.000458453	12493, 14127, 12259, 16331, 20344, 56743, 12260, 12263, 74039, 12518, 12262	183	206	13588	3.96488	0.461052	0.0265175	0.749241
545527	Fam194a					GOTERM_BP_FAT	GO:0048584~positive regulation of response to stimulus	10	4.13223	0.000901831	14127, 12259, 16176, 56743, 12260, 12263, 21926, 74039, 12518, 12262	183	186	13588	3.99201	0.703651	0.0425065	1.46883
23920	Insrr					GOTERM_BP_FAT	GO:0050778~positive regulation of immune response	8	3.30579	0.00235932	14127, 12259, 56743, 12260, 12263, 74039, 12518, 12262	183	136	13588	4.36773	0.958586	0.0846493	3.79992
20605	Sstr1					GOTERM_BP_FAT	GO:0042113~B cell activation	6	2.47934	0.00391358	18987, 56743, 17060, 74039, 12518, 321019	183	78	13588	5.71164	0.994937	0.123787	6.22866
93875	Pcdhb4					GOTERM_BP_FAT	GO:0050853~B cell receptor signaling pathway	3	1.23967	0.0146066	56743, 74039, 12518	183	14	13588	15.911	1	0.31219	21.4412
15163	Hcls1					GOTERM_BP_FAT	GO:0002429~immune response-activating cell surface receptor signaling pathway	4	1.65289	0.0173548	14127, 56743, 74039, 12518	183	41	13588	7.24404	1	0.348895	24.9584
629557	Gm6981					GOTERM_BP_FAT	GO:0002768~immune response-regulating cell surface receptor signaling pathway	4	1.65289	0.0209443	14127, 56743, 74039, 12518	183	44	13588	6.75012	1	0.393818	29.3298
71687	Tmem25					GOTERM_BP_FAT	GO:0002757~immune response-activating signal transduction	4	1.65289	0.0263155	14127, 56743, 74039, 12518	183	48	13588	6.18761	1	0.429758	35.4268
207777	Bzrap1					GOTERM_BP_FAT	GO:0002764~immune response-regulating signal transduction	4	1.65289	0.0323538	14127, 56743, 74039, 12518	183	52	13588	5.71164	1	0.484028	41.6899
319187	Hist1h2bn					GOTERM_BP_FAT	GO:0050851~antigen receptor-mediated signaling pathway	3	1.23967	0.083591	56743, 74039, 12518	183	36	13588	6.18761	1	0.741415	76.1085
20183	Rxrg
232370	Clstn3
94176	Dock2
16669	Krt19
212032	Hk3
216974	Proca1
328258	Slc25a48
16411	Itgax
73677	Psma8
14799	Gria1
56773	Chst5
21990	Tph1
83490	Pik3ap1
11433	Acp5
12495	Entpd1
16815	Lbx2
14800	Gria2
22029	Traf1
20465	Sim2
17084	Ly86
22259	Nr1h3
50498	Ebi3
70458	2610318N02Rik
208943	Myo5c
235674	Acaa1b
57738	Slc15a2
14049	Eya2
68910	Zfp467
226527	BC026585
211228	Lrrc25
12514	Cd68
17172	Ascl1
212516	BC060267
21926	Tnf
98845	Eps8l2
13449	Dok2
12493	Cd37
19354	Rac2
319713	Ablim3
11689	Alox5
12294	Cacna2d3
12845	Comp
24115	Best1
213956	Fam83f
15504	Dnajb3
320974	Lrrn4
22409	Wnt10a
269799	Clec4a1
77996	D730039F16Rik
108101	Fermt3
12273	C5ar1
70839	P2ry12
21385	Tbx2
232984	B3gnt8
14293	Fpr1
14563	Gdf5
17972	Ncf4
17533	Mrc1
12263	C2
18733	Lilrb3
60363	Cldn15
218440	Ankrd34b
13180	Pcbd1
66184	Rps4y2
216799	Nlrp3
241528	Lrrc55
12491	Cd36
192187	Stab1
78303	Hist3h2ba
67666	Hapln3
71520	Grap
20304	Ccl5
74016	Phf19
16792	Laptm5
14676	Gna15
12262	C1qc
140497	AF251705
268973	Nlrc4
54003	Nell2
14872	Gstt2
30955	Pik3cg
56743	Lat2
15900	Irf8
20911	Stxbp2
227327	B3gnt7
20375	Sfpi1
12259	C1qa
12978	Csf1r
22324	Vav1
271711	Tmem169
104759	Pld4
16995	Ltb4r1
230787	BC013712
12260	C1qb
338368	Fam109b
70967	4931408A02Rik
53897	Gal3st1
80910	Gpr84
93876	Pcdhb5
215446	Entpd3
22153	Tubb4
17451	Mos
50934	Slc7a8
17916	Myo1f
110310	Krt7
11501	Adam8
19826	Rnps1
233040	Fbxo27
57278	Bcam
17474	Clec4d
210801	Unc5d
13386	Dlk1
213980	Fbxw10
13363	Dhh
19739	Rgs9
80838	Hist1h1a
18751	Prkcb
207839	Galnt6
17060	Blnk
54135	Lsr
74039	Nfam1
545276	Gal3st3
57754	Cend1
23833	Cd52
17285	Meox1
70719	Hmha1
71950	Nanog
57778	Fmnl1
14127	Fcer1g
12045	Bcl2a1b
215303	Camk1g
382913	Neil2
54486	Hpgds
20302	Ccl3
215632	Psd4
16154	Il10ra
67516	Kctd4
59033	Slc4a8
56619	Clec4e
50778	Rgs1
69524	Esam
16890	Lipe
17969	Ncf1
12267	C3ar1
321019	Gpr183
12824	Col2a1
207818	Smagp
67020	Tmem88
16822	Lcp2
20344	Selp
26386	Hsf4
17079	Cd180
20303	Ccl4
12983	Csf2rb
51875	Tmem141
18111	Nnat
20310	Cxcl2
13393	Dlx3
14913	Guca1a
442801	Arhgef15
20359	Sema6b
69769	Tnfaip8l2
69069	1810011H11Rik
80719	Igsf6
