# Supplementary material for: Genome-wide DNA methylation patterns in LSH mutant reveals de-repression of repeat elements and redundant epigenetic silencing pathways
Source: HighWire-hosted journal article supplement (doi:10.1101/gr.172015.114), 2014-08-28
Supplement: Table_S2.xlsx [file Table_S2.xlsx]

## Sheet: Sheet1
Table S2
CG methylation at different Repeat classes
The repeats have been ranked based on CG methylation differnces with greates methylation loss in KO MEFs compared to WT MEFs at the top of the table.
fraction reduced presents the fraction of repeats that show methylation reduction
mC reduction presents relative methylation decrease in KO MEFs compared to WT MEFs
fraction increased presents the fraction of repeats that show methylation increases
RNA level are presented as reads/base obtained from RNA-seq analysis
Lad presents fraction of the repeat class that is located within LAD domains
Repeat	Length	Frequeny	fraction reduced	mC reduction	fraction increased	mC increase	WT RNA	KO RNA	LAD
GSAT_MM#Satellite	471	221	1	0.698818	0	NaN	11.1975	495.643	0.0497738
IAPLTR4#LTR/ERVK	345	407	0.899263	0.72084	0.0810811	0.331269	36.6551	193.4	0.771499
ERVB4_1-I_MM#LTR/ERVK	8316	597	0.924623	0.686557	0.0435511	0.336797	0	0.114238	0.718593
SYNREP_MM#Satellite	266	35	0.828571	0.758626	0.0285714	0.00821918	4.44737	1314.89	0.457143
IAP1-MM_I#LTR/ERVK	3853	2459	0.882879	0.710115	0.0858072	0.308745	23.4303	247.645	0.620171
MusHAL1#LINE/L1	2712	52492	0.825764	0.752136	0.0285948	0.313638	41.4886	43.632	0.73154
RLTR13A#LTR/ERVK	855	675	0.908148	0.669828	0.0681481	0.27921	33.345	33.2094	0.662222
RLTR13A2#LTR/ERVK	958	588	0.901361	0.663393	0.0748299	0.296246	10.2077	11.7589	0.64966
IAPEy-int#LTR/ERVK	7513	1768	0.918552	0.650937	0.043552	0.356562	0.288433	10.2449	0.711538
RLTR6C_Mm#LTR/ERV1	463	725	0.816552	0.729788	0.108966	0.42887	556.54	3091.24	0.675862
ERVB5_1-I_MM#LTR/ERVK	8336	177	0.830508	0.710458	0.0621469	0.427904	0	0	0.728814
ERVB4_1-LTR_MM#LTR/ERVK	521	472	0.805085	0.724639	0.167373	0.309964	0	0	0.726695
RLTR13A3#LTR/ERVK	978	620	0.893548	0.652436	0.0709677	0.267591	45.3722	55.7597	0.656452
RLTR50B#LTR/ERVK	489	408	0.796569	0.730838	0.10049	0.380515	0	0	0.720588
IAPEY5_I#LTR/ERVK	3574	4558	0.909171	0.636202	0.0721808	0.442441	13.3864	23.9214	0.609039
IAPEY4_I#LTR/ERVK	7673	2176	0.89614	0.642832	0.0183824	0.31686	782.812	685.714	0.650735
L1_Mm_orf2#LINE/L1	4681	113970	0.79449	0.721795	0.0404843	0.324168	716.435	1845.9	0.720584
ERVB4_1B-LTR_MM#LTR/ERVK	522	664	0.796687	0.717422	0.177711	0.327907	6.341	11.0211	0.724398
ERVB4_1C-LTR_Mm#LTR/ERVK	515	399	0.779449	0.729438	0.180451	0.355361	0.374757	1.50485	0.711779
ERVB2_1A-I_MM#LTR/ERVK	7062	397	0.826196	0.68812	0.0302267	0.334165	2.05154	1.97805	0.717884
RLTR3_Mm#LTR/ERVK	1328	6	1	0.567986	0	0	0	0.921687	0.666667
IAP-d#LTR/ERVK	6542	2074	0.816297	0.694127	0.0819672	0.378399	2.23831	8.25634	0.623915
IAPLTR3-int#LTR/ERVK	6821	3442	0.979082	0.567387	0.00987798	0.297255	4.34071	17.3451	0.633643
L1_Mus3_orf2#LINE/L1	4690	132633	0.76726	0.723122	0.0418599	0.32264	118.285	166.566	0.724103
MuRRS-int#LTR/ERV1	4690	861	0.75842	0.704051	0.102207	0.463189	21.2797	21.0682	0.615563
ETnERV#LTR/ERVK	6836	1663	0.847264	0.629597	0.0252556	0.195538	35.8439	21.3615	0.667468
MMERVK10C#LTR/ERVK	7581	5694	0.872673	0.607184	0.0983491	0.309492	24.2333	46.3703	0.628205
ERVB4_3-I_MM#LTR/ERVK	8574	232	0.814655	0.640031	0.0646552	0.46834	0.894448	8.86028	0.784483
ERVB4_2-I_MM#LTR/ERVK	8374	983	0.819939	0.633901	0.0671414	0.361013	2.52651	2.03857	0.698881
IAPEY3-int#LTR/ERVK	7680	3843	0.8293	0.62613	0.0562061	0.379119	1.21758	10.6273	0.665626
ERVB7_3-LTR_MM#LTR/ERVK	408	413	0.757869	0.683572	0.150121	0.427708	0.980392	4.64216	0.617433
MMERVK9E_I#LTR/ERVK	6152	1827	0.775041	0.663557	0.0361248	0.27724	3.4605	9.62549	0.69075
IAPEY4_LTR#LTR/ERVK	326	128	0.8125	0.632258	0.15625	0.305939	2403.2	1590.85	0.648438
MMERVK10D3_I#LTR/ERVK	6156	1034	0.753385	0.680079	0.187621	0.405519	7.06157	185.345	0.619923
RLTR43C#LTR/ERVK	366	191	0.675393	0.757006	0.104712	0.402074	0.281421	1.78142	0.581152
RLTR50A#LTR/ERVK	403	67	0.671642	0.750935	0.164179	0.440007	0	0	0.820896
ERVB5_2-LTR_MM#LTR/ERVK	457	280	0.732143	0.687203	0.0964286	0.252956	25.6565	24.1772	0.603571
ETnERV3#LTR/ERVK	5808	1404	0.720085	0.698134	0.025641	0.329836	2.53461	2.0532	0.701567
MERVL#LTR/ERVL	5485	3310	0.883686	0.566435	0.0510574	0.319501	178.039	217.465	0.453172
ERVB4_1B-I_MM#LTR/ERVK	4288	2493	0.682712	0.731381	0.0236663	0.298854	0.791278	3.60215	0.739671
IAPEz-int#LTR/ERVK	6481	9516	0.907419	0.547551	0.0672551	0.26344	1503.13	89902.4	0.624947
LTRIS4#LTR/ERV1	507	128	0.742188	0.666609	0.109375	0.311811	2.17554	2.88166	0.546875
ERVB5_1-LTR_MM#LTR/ERVK	415	60	0.633333	0.78047	0.0333333	0.492118	0	0	0.6
L1Md_F3_3end#LINE/L1	998	113700	0.800959	0.613101	0.0992172	0.319594	1059.93	1251.53	0.686596
L1Md_A_3end#LINE/L1	996	105349	0.802001	0.611581	0.0955491	0.313254	646.217	977.193	0.686053
IAP1-MM_LTR#LTR/ERVK	292	391	0.751918	0.65008	0.212276	0.429777	39.9726	401.397	0.703325
L1Md_T_3end#LINE/L1	996	109694	0.797245	0.611618	0.0982278	0.319403	1148.98	3075.74	0.683994
LTRIS_Mus#LTR/ERV1	587	1908	0.735325	0.656748	0.128407	0.368058	109.591	102.034	0.484277
RLTR13A1#LTR/ERVK	873	1967	0.815963	0.591766	0.143366	0.327438	7.53952	10.9691	0.637011
L1Md_F2_3end#LINE/L1	996	127753	0.78341	0.615414	0.099575	0.326011	1156.33	1792.58	0.684407
MuRRS4-int#LTR/ERV1	5063	1714	0.724037	0.663405	0.0752625	0.399839	2.25518	15.8137	0.631855
ERVB7_2-LTR_MM#LTR/ERVK	372	438	0.771689	0.618308	0.200913	0.396979	1.86022	1.19892	0.557078
ERVB3_1-I_MM#LTR/ERVK	5416	577	0.717504	0.664027	0.0623917	0.283246	0	0	0.618718
RLTR1F_Mm#LTR/ERVK	590	76	0.855263	0.553718	0.131579	0.289997	6.55932	341.042	0.473684
RLTR13D2#LTR/ERVK	1023	1221	0.719083	0.657157	0.115479	0.368394	7.54252	9.30694	0.5905
MMERVK9C_I#LTR/ERVK	4767	3303	0.716016	0.658349	0.0417802	0.311616	2.3841	3.93161	0.70663
RLTR13B4#LTR/ERVK	803	2864	0.806215	0.583207	0.126397	0.308616	10.6563	15.6999	0.633031
MERV1_I#LTR/ERV1	4961	670	0.692537	0.678379	0.129851	0.408579	0	0	0.604478
ERVB4_3-LTR_MM#LTR/ERVK	510	166	0.692771	0.677364	0.0722892	0.282854	0	3.68039	0.783133
RLTR9E#LTR/ERVK	409	972	0.680041	0.688172	0.160494	0.400009	2.49633	3.54279	0.68107
MMERGLN-int#LTR/ERV1	7556	404	0.806931	0.577249	0.111386	0.313432	19.9371	441.458	0.55198
L1Md_F_5end#LINE/L1	1139	25881	0.690661	0.673998	0.133496	0.459693	17.9148	27.6831	0.750667
RLTR6B_Mm#LTR/ERV1	569	884	0.822398	0.560963	0.111991	0.286486	135.457	2317.38	0.649321
ETnERV2#LTR/ERVK	7406	4405	0.689444	0.668751	0.030193	0.275973	0.318526	1.35836	0.703292
L1_Mus2_3end#LINE/L1	980	129577	0.741698	0.621317	0.0948702	0.339146	123.132	129.077	0.686727
RLTR45#LTR/ERVK	482	1702	0.737955	0.62177	0.194477	0.44389	0	0	0.626322
LTRIS_Mm#LTR/ERV1	482	1948	0.699692	0.654554	0.152977	0.433669	306.216	179.467	0.465092
LTRIS6#LTR/ERV1	335	1466	0.785812	0.582522	0.161664	0.357175	0	0	0.499318
RLTR13B3#LTR/ERVK	929	2476	0.805331	0.56792	0.134491	0.283293	58.9483	60.3143	0.635703
LTRIS5#LTR/ERV1	447	178	0.719101	0.634871	0.140449	0.338452	0	0	0.455056
L1_Mus1_3end#LINE/L1	981	133583	0.73305	0.620502	0.0929385	0.335203	784.08	707.519	0.684735
RLTR46B#LTR/ERVK	384	219	0.748858	0.606655	0.196347	0.374987	25.0234	37.3073	0.694064
LTRIS4A#LTR/ERV1	474	226	0.685841	0.661815	0.110619	0.272121	13.0865	13.6983	0.681416
RLTR13B2#LTR/ERVK	822	1417	0.827805	0.548092	0.116443	0.307197	30.2056	44.837	0.631616
L1_Mus4_3end#LINE/L1	1050	108003	0.710591	0.635693	0.0893771	0.356276	50.8819	54.0333	0.697934
RLTR13F#LTR/ERVK	918	1268	0.740536	0.609745	0.153785	0.352508	6.17865	8.53268	0.599369
RLTR47#LTR/ERVK	431	90	0.711111	0.634712	0.0777778	0.403304	0	0.937355	0.866667
L1_Mus3_3end#LINE/L1	1052	129413	0.712262	0.629064	0.0948823	0.354562	67.9059	77.4848	0.686098
RLTR13D3#LTR/ERVK	1114	1182	0.659052	0.677463	0.0913706	0.330431	0	0	0.576142
MURVY-int#LTR/ERV1	7452	53	0.792453	0.562595	0.113208	0.545785	0	0	0.566038
RLTR44-int#LTR/ERVK	2812	425	0.783529	0.564843	0.148235	0.288703	12.6529	18.5018	0.590588
RLTR13C1#LTR/ERVK	983	1468	0.691417	0.639331	0.111035	0.321165	2.7294	6.25331	0.613079
L1VL1_5end#LINE/L1	1128	18320	0.644323	0.685306	0.0688865	0.362238	11.2996	14.656	0.725764
RLTR13E#LTR/ERVK	993	2104	0.720057	0.611063	0.132605	0.322299	23.6667	23.2195	0.617871
RLTR13B1#LTR/ERVK	893	3359	0.759452	0.579161	0.126526	0.311959	37.4446	36.1478	0.629056
LTRIS4B#LTR/ERV1	391	106	0.735849	0.593754	0.179245	0.330303	0.465473	0.470588	0.45283
RLTR9C#LTR/ERVK	393	196	0.596939	0.73069	0.117347	0.461406	0	0	0.668367
RLTR1D#LTR/ERV1	605	1356	0.668879	0.651253	0.181416	0.370162	8.48264	8.10083	0.550147
MERV1_LTR#LTR/ERV1	503	457	0.691466	0.627707	0.100656	0.367682	1.98807	0	0.5186
RLTR1C#LTR/ERV1	503	1522	0.713535	0.60734	0.228647	0.376227	55.7873	38.8588	0.524967
RLTR8#LTR/ERVK	365	197	0.690355	0.627476	0.19797	0.361437	0	0	0.456853
RMER17A-int#LTR/ERVK	1728	121	0.578512	0.743912	0.123967	0.339837	0	1.81366	0.743802
RLTR6_Mm#LTR/ERV1	654	1274	0.801413	0.530239	0.151491	0.260777	2741.29	5466.02	0.622449
MMETn-int#LTR/ERVK	4844	2355	0.71465	0.59447	0.0254777	0.298594	50.5815	33.8289	0.677707
SRV_MM-int#LTR/ERVK	6139	116	0.577586	0.734776	0.12931	0.376505	0.870663	1.24792	0.698276
MLTR25C#LTR/ERVK	1424	255	0.694118	0.609176	0.0980392	0.249876	0	0	0.643137
RLTR13D5#LTR/ERVK	1023	2821	0.6838	0.611717	0.115562	0.337586	0	0	0.632045
RLTR13D6#LTR/ERVK	902	1088	0.64614	0.64696	0.100184	0.34678	7.49557	32.2816	0.655331
RLTR13C2#LTR/ERVK	808	1960	0.736735	0.567072	0.137245	0.304792	37.8057	39.5198	0.646939
RLTR46A2#LTR/ERVK	329	59	0.677966	0.612271	0.186441	0.379882	0	0	0.711864
RLTR53B_Mm#LTR/ERVK	409	4	1	0.41307	0	NaN	0	0	0.25
MMERVK10D3_LTR#LTR/ERVK	357	173	0.693642	0.594126	0.283237	0.380548	7	204.627	0.635838
RLTR47_MM#LTR/ERV1	532	429	0.657343	0.624335	0.100233	0.444006	0	0.398496	0.498834
IAPA_MM#LTR/ERVK	334	6124	0.79115	0.514737	0.127368	0.312438	310.102	12649.1	0.600751
ERVB7_2B-LTR_MM#LTR/ERVK	358	377	0.679045	0.596378	0.254642	0.401786	0.527933	0.455307	0.538462
RMER17A#LTR/ERVK	751	2197	0.599454	0.67518	0.185253	0.533745	2.69507	3.83755	0.690487
RLTR45-int#LTR/ERVK	7244	4881	0.601516	0.671655	0.0321655	0.394568	9.63542	13.9771	0.688384
ERVB7_4-LTR_MM#LTR/ERVK	429	347	0.564841	0.715029	0.204611	0.492264	0	0	0.628242
RLTR13C3#LTR/ERVK	1010	3099	0.656986	0.613022	0.134882	0.341733	1.65842	0.661386	0.650532
MT2_Mm#LTR/ERVL	493	5267	0.655781	0.61292	0.0692994	0.502196	548.933	642.083	0.47902
MT-int#LTR/ERVL-MaLR	1098	5892	0.642057	0.623761	0.12814	0.360589	901.256	912.309	0.498133
MT2C_Mm#LTR/ERVL	475	5560	0.647662	0.61743	0.0776978	0.486575	90.7389	123.823	0.461331
RLTR13D3A1#LTR/ERVK	951	639	0.668232	0.597033	0.143975	0.308399	67.2944	41.571	0.352113
MURVY-LTR#LTR/ERV1	519	878	0.628702	0.633277	0.215262	0.514161	14.5241	17.6513	0.398633
Lx3_Mus_3end#LINE/L1	1423	25574	0.595918	0.668096	0.0913037	0.37542	47.8426	42.39	0.710917
L1VL2_5end#LINE/L1	1045	10302	0.552029	0.720093	0.0996894	0.452981	5.08517	5.96172	0.662978
RLTR13G#LTR/ERVK	883	1369	0.664719	0.597968	0.134405	0.329482	1.44054	5.47905	0.625274
ERVB4_2-LTR_MM#LTR/ERVK	553	1880	0.629255	0.629379	0.178723	0.478375	0	2.37794	0.62766
ORR1A1-int#LTR/ERVL-MaLR	1792	7023	0.625089	0.633215	0.162893	0.358429	310.86	663.175	0.482415
RLTRETN_Mm#LTR/ERVK	322	2050	0.694146	0.5673	0.284878	0.365437	82.705	86.5901	0.520976
RLTR22_Mus#LTR/ERVK	1808	1729	0.576634	0.678198	0.0913823	0.380645	8.38993	10.7273	0.629844
MusHAL1_5end#LINE/L1	784	10796	0.542053	0.718439	0.0837347	0.423547	6.30485	4.65561	0.683587
RLTR34D_MM#LTR/ERVK	640	53	0.641509	0.606438	0.150943	0.43361	0	0	0.566038
RLTR48A#LTR/ERV1	702	561	0.631016	0.615119	0.188948	0.367684	4.04274	5.09972	0.424242
RLTR9F#LTR/ERVK	415	435	0.583908	0.664626	0.264368	0.517892	0	0	0.54023
RLTR1E_MM#LTR/ERV1	648	1042	0.621881	0.617483	0.193858	0.337001	0	0	0.519194
RLTR10D#LTR/ERVK	359	2395	0.604593	0.634153	0.300626	0.566044	1.65738	0.874652	0.563674
RLTR1D2_MM#LTR/ERV1	602	493	0.651116	0.58721	0.225152	0.403762	6.22924	2.39037	0.521298
RLTR17D_Mm#LTR/ERVK	873	276	0.608696	0.626621	0.0942029	0.320606	0	0	0.554348
RLTR10A#LTR/ERVK	411	2622	0.670481	0.567836	0.266209	0.47119	23.0827	36.4185	0.565599
ERVB2_1-I_MM#LTR/ERVK	6939	233	0.566524	0.671829	0.0472103	0.209755	0.0696066	2.54547	0.712446
LTRIS2#LTR/ERV1	564	1712	0.76285	0.495109	0.173481	0.303418	49.5745	41.1277	0.549065
RLTR41B#LTR/ERV1	404	94	0.691489	0.545051	0.234043	0.301139	1.01485	0	0.276596
RLTR16C_MM#LTR/ERVK	627	54	0.666667	0.560533	0.259259	0.391399	0	0	0.462963
RLTR20C2_MM#LTR/ERVK	497	253	0.628458	0.594581	0.181818	0.417659	0	0	0.300395
RLTR1A2_MM#LTR/ERV1	547	782	0.632992	0.583217	0.283887	0.397172	0	1.02742	0.466752
L1Md_A_5end#LINE/L1	1344	34359	0.592247	0.618492	0.320033	0.567418	56.6183	195.629	0.738205
MLTR18C_MM#LTR/ERVK	700	98	0.581633	0.628509	0.112245	0.388726	0	0	0.387755
RLTR9D#LTR/ERVK	403	1064	0.527256	0.692849	0.184211	0.487719	1.02233	0.444169	0.640977
BGLII#LTR/ERVK	421	2189	0.64413	0.566881	0.149383	0.408136	7.50356	9.64371	0.622202
RLTR48B#LTR/ERV1	530	179	0.530726	0.686978	0.0949721	0.33517	0	0	0.379888
L1_Mus3_5end#LINE/L1	1028	19609	0.549391	0.661004	0.0664491	0.40554	2.37451	2.35603	0.693253
RLTR34B_MM#LTR/ERVK	637	60	0.65	0.554095	0.183333	0.320582	0	0	0.35
ERVB7_1-LTR_MM#LTR/ERVK	319	1721	0.643812	0.558585	0.319001	0.396611	123.329	85.4107	0.532249
RLTR16B_MM#LTR/ERVK	700	1094	0.64808	0.554686	0.248629	0.367949	0	0	0.47532
LTRIS3#LTR/ERV1	512	1679	0.720071	0.498414	0.174509	0.31967	17.9531	18.752	0.54735
BGLII_Mus#LTR/ERVK	422	1718	0.640279	0.558204	0.154249	0.408103	0	0	0.600698
RLTR48C#LTR/ERV1	489	390	0.564103	0.633576	0.205128	0.416837	0	2.71575	0.387179
RLTR4_Mm#LTR/ERV1	742	855	0.577778	0.616196	0.182456	0.373743	1905.39	999.964	0.430409
L1Md_Gf_5end#LINE/L1	1142	28571	0.567744	0.622252	0.269399	0.660432	135.829	165.908	0.726821
RLTR1#LTR/ERV1	624	817	0.645043	0.547551	0.331701	0.376992	0.110577	0	0.414933
RMER17A2#LTR/ERVK	906	3237	0.566883	0.621504	0.19895	0.551053	2.10927	1.06733	0.578931
IAPLTR3#LTR/ERVK	326	907	0.659316	0.529146	0.309813	0.466184	6.21779	1.70552	0.576626
RLTR9A4#LTR/ERVK	363	21	0.571429	0.607008	0.238095	0.198628	0	0	0.619048
RLTR46A#LTR/ERVK	321	132	0.613636	0.563463	0.295455	0.521088	0	0	0.787879
RMER17B2#LTR/ERVK	967	1077	0.594243	0.568212	0.26091	0.466702	2.53154	1.74457	0.502321
RLTR49#LTR/ERVK	780	188	0.569149	0.58326	0.138298	0.48037	0	0	0.319149
RLTR5_Mm#LTR/ERV1	628	88	0.613636	0.539553	0.352273	0.32861	0.152866	17.0048	0.556818
RLTR13D3A#LTR/ERVK	836	1156	0.518166	0.632239	0.08391	0.291491	0.852871	0	0.605536
RLTR9A3B#LTR/ERVK	390	168	0.482143	0.677708	0.0892857	0.322112	0	0	0.571429
RLTR13D4#LTR/ERVK	1033	2524	0.505151	0.644621	0.0970681	0.374085	1.68345	3.40852	0.645008
RLTR44E#LTR/ERVK	452	549	0.577413	0.563262	0.335155	0.484387	0	0	0.54827
MLTR18B_MM#LTR/ERVK	635	39	0.666667	0.483663	0.128205	0.353974	0	0	0.333333
RLTR17C_Mm#LTR/ERVK	804	119	0.521008	0.607408	0.117647	0.355792	0.697761	0	0.411765
RLTR20C1_MM#LTR/ERVK	570	203	0.551724	0.573349	0.137931	0.39066	0	0	0.305419
RLTR26_Mus#LTR/ERVK	673	395	0.465823	0.674374	0.341772	0.590623	0	0	0.574684
RLTR6-int#LTR/ERV1	7778	1359	0.502575	0.624543	0.287712	0.684885	18.7906	704.025	0.639441
RLTR27#LTR/ERVK	309	584	0.537671	0.583643	0.414384	0.523156	0	0.488673	0.583904
IAPEY5_LTR#LTR/ERVK	293	213	0.619718	0.502411	0.347418	0.445903	11.0137	207.997	0.685446
RLTR9D2#LTR/ERVK	389	570	0.436842	0.712688	0.182456	0.538937	2.43702	3.19794	0.55614
RLTR53_Mm#LTR/ERVK	423	122	0.54918	0.563607	0.270492	0.444922	0	0	0.286885
RLTR44A#LTR/ERVK	405	396	0.580808	0.53237	0.378788	0.484144	2.3037	1.97778	0.55303
RLTR9B2#LTR/ERVK	420	520	0.432692	0.709104	0.180769	0.524106	0	0	0.521154
MLTR25A#LTR/ERVK	1106	1460	0.537671	0.570516	0.14726	0.404742	0	0	0.489041
RLTR41C#LTR/ERV1	545	110	0.545455	0.56187	0.227273	0.432029	0	1.10092	0.527273
IAPLTR1a_Mm#LTR/ERVK	337	10011	0.702327	0.43106	0.284887	0.352891	540.632	43102.1	0.594346
IAPLTR2b#LTR/ERVK	327	9974	0.6923	0.436548	0.285141	0.375228	95.1621	94	0.60016
RLTR44D#LTR/ERVK	486	463	0.572354	0.527217	0.336933	0.497305	3.7716	4.32922	0.570194
IAPLTR2a#LTR/ERVK	411	10413	0.681936	0.44073	0.297321	0.389892	30.9781	71.6472	0.600884
RLTR45-int_6014_6374#buffer	361	1481	0.422687	0.707773	0.0324105	0.399723	0	1.41551	0.66104
RLTR44C#LTR/ERVK	502	638	0.565831	0.527693	0.304075	0.496156	2.25697	2.79283	0.587774
IAPLTR1_Mm#LTR/ERVK	367	10028	0.690068	0.432643	0.294276	0.370247	1687.7	131880	0.592341
RLTR19A2#LTR/ERVK	507	53	0.528302	0.564871	0.0943396	0.489982	0	0	0.377358
RLTR44B#LTR/ERVK	449	464	0.560345	0.529895	0.385776	0.48256	0	0	0.530172
IAPLTR2_Mm#LTR/ERVK	475	11061	0.67191	0.441717	0.305126	0.386663	128.836	106.568	0.600307
IAPLTR2a2_Mm#LTR/ERVK	444	8314	0.655882	0.451886	0.323911	0.411261	126.164	230.878	0.610657
RLTR20B5_MM#LTR/ERVK	578	249	0.522088	0.566458	0.120482	0.428171	0	0	0.421687
RLTR30D_MM#LTR/ERV1	482	114	0.561404	0.525529	0.263158	0.438191	0	0	0.280702
RLTR1B-int#LTR/ERV1	3299	3032	0.46471	0.634867	0.189974	0.664503	27.3095	19.5705	0.602902
RLTR51A_Mm#LTR/ERVK?	351	355	0.507042	0.575459	0.191549	0.622805	0	0	0.405634
IAPEY3_LTR#LTR/ERVK	332	1526	0.556356	0.523707	0.431193	0.437412	10.9187	19.3645	0.651376
RLTR19D#LTR/ERVK	438	26	0.538462	0.540035	0.0384615	NaN	0	0	0.346154
IAPEY3C_LTR#LTR/ERVK	304	3809	0.577579	0.500547	0.38409	0.502599	16.4605	27.2237	0.561827
MLTR31A_MM#LTR/ERVK	583	806	0.601737	0.478403	0.152605	0.36658	0	0.252144	0.434243
IAPEY2_LTR#LTR/ERVK	357	1792	0.540737	0.527438	0.430804	0.461035	17.2661	36.0644	0.648438
MuLV-int#LTR/ERV1	7606	191	0.774869	0.365402	0.136126	0.278775	511.224	275.38	0.34555
RLTR41#LTR/ERV1	446	417	0.477218	0.588546	0.232614	0.524621	0.780269	0	0.436451
RLTR31_Mm#LTR/ERVK	561	753	0.568393	0.492452	0.151394	0.408067	0.877005	1.77005	0.454183
RLTR1B#LTR/ERV1	512	2302	0.54344	0.514016	0.369679	0.452314	48.7559	62.3574	0.425717
MLTR31F_MM#LTR/ERVK	548	1019	0.560353	0.498202	0.142296	0.403005	0.729927	0	0.45633
RLTR9A#LTR/ERVK	368	466	0.472103	0.588159	0.16309	0.413286	0	0	0.487124
B1_Mm#SINE/Alu	147	102394	0.53926	0.510586	0.380696	0.457175	5271.69	4733.9	0.217298
MLTR31D_MM#LTR/ERVK	581	793	0.559899	0.491471	0.142497	0.379202	0	0	0.461538
RLTR20A2B_MM#LTR/ERVK	573	113	0.504425	0.543428	0.176991	0.433937	0	0	0.283186
MLTR31C_MM#LTR/ERVK	617	951	0.53102	0.514415	0.14511	0.397385	0	0	0.464774
RMER13A2#LTR/ERVK	779	337	0.474777	0.575194	0.261128	0.471532	0	0	0.400593
RLTR20B3A_MM#LTR/ERVK	589	309	0.530744	0.510295	0.12945	0.355192	0	0	0.38835
RLTR20B4_MM#LTR/ERVK	566	190	0.536842	0.499777	0.163158	0.428398	0	0	0.357895
RLTR10E#LTR/ERVK	311	2025	0.595062	0.447067	0.388148	0.403473	0.401929	1.32797	0.483951
RLTR26B_MM#LTR/ERVK	716	163	0.380368	0.698172	0.214724	0.647659	0	0	0.398773
RLTR9A3#LTR/ERVK	305	466	0.401288	0.661558	0.0965665	0.429397	0	0	0.508584
MMERGLN_LTR#LTR/ERV1	430	1181	0.532599	0.496275	0.362405	0.40543	144.086	893.102	0.394581
MLTR31FA_MM#LTR/ERVK	576	889	0.521935	0.504883	0.134983	0.4166	6.72049	7.95833	0.454443
RLTR31A_Mm#LTR/ERVK	584	924	0.524892	0.495677	0.149351	0.414169	0	0	0.459957
B1_Mus2#SINE/Alu	147	120120	0.507784	0.508524	0.362188	0.46312	3404.2	2927.69	0.196836
B1_Mus1#SINE/Alu	148	128579	0.504017	0.510012	0.348844	0.462215	5554.55	5075.7	0.204606
RLTR31B_Mm#LTR/ERVK	557	554	0.48556	0.529107	0.16426	0.427419	0	0	0.498195
RLTR34C_MM#LTR/ERVK	611	139	0.503597	0.509762	0.0863309	0.267951	0	0	0.503597
RLTR13D1#LTR/ERVK	806	1179	0.407973	0.629046	0.109415	0.415312	1.47146	5.9268	0.612383
MMVL30-int#LTR/ERV1	3698	3132	0.42433	0.600009	0.315134	0.719687	2812	9903.68	0.606641
RLTR4_MM-int#LTR/ERV1	7601	148	0.817568	0.311259	0.121622	0.24301	654.64	417.67	0.202703
MTA_Mm#LTR/ERVL-MaLR	396	23724	0.37363	0.678873	0.125738	0.586712	3548.14	3728.95	0.451821
RLTR20A3_MM#LTR/ERVK	548	271	0.512915	0.494201	0.188192	0.476299	0	0	0.339483
RLTR41A2#LTR/ERV1	473	626	0.429712	0.588219	0.260383	0.48252	0	0.215645	0.447284
RLTR10#LTR/ERVK	390	5732	0.543615	0.462981	0.196092	0.335151	349.438	589.736	0.596301
BGLII_C#LTR/ERVK	463	107	0.439252	0.572781	0.214953	0.368589	0	0	0.299065
MLTR31E_MM#LTR/ERVK	566	974	0.486653	0.51617	0.129363	0.365184	1.4629	1.18905	0.463039
MTB_Mm#LTR/ERVL-MaLR	407	25961	0.370903	0.673872	0.135549	0.592908	240.619	242.383	0.433458
RLTR17B_Mm#LTR/ERVK	802	271	0.391144	0.637607	0.0442804	0.408209	0	0	0.542435
IAPLTR4_I#LTR/ERVK	1470	2275	0.592527	0.414483	0.401758	0.318797	0.34898	77.7741	0.58989
RLTR24B_MM#LTR/ERV1	435	55	0.381818	0.627202	0.254545	0.312969	0	0	0.163636
RMER13A1#LTR/ERVK	809	409	0.405868	0.588916	0.325183	0.497243	0	0	0.381418
RLTR10B2#LTR/ERVK	365	4513	0.516951	0.460556	0.348549	0.406819	28.4055	31.1534	0.540882
RLTR10B#LTR/ERVK	292	4785	0.500731	0.471993	0.335423	0.424526	38.0925	67.9041	0.53814
RLTR10C#LTR/ERVK	434	4915	0.555239	0.423553	0.291556	0.360301	214.403	236.721	0.523703
IAPEY_LTR#LTR/ERVK	385	1169	0.479897	0.489326	0.50556	0.467016	51.9065	203.356	0.655261
RLTR26C_MM#LTR/ERVK	674	127	0.393701	0.595704	0.291339	0.564723	0	0	0.377953
RLTR9A2#LTR/ERVK	383	272	0.386029	0.60603	0.172794	0.512914	0	0	0.518382
RLTR26D_MM#LTR/ERVK	800	122	0.434426	0.538383	0.278689	0.592466	0	0	0.368852
MLTR32C_MM#LTR/ERVK	616	67	0.41791	0.555785	0.0746269	0.331926	0	0	0.38806
MMSAT4#Satellite	168	544	0.299632	0.769595	0.0441176	0.308315	74.9762	240.554	0.941176
RLTR9B#LTR/ERVK	437	630	0.349206	0.643992	0.147619	0.518681	0	0	0.498413
RLTR30B_MM#LTR/ERV1	482	258	0.368217	0.601539	0.158915	0.589632	0	0	0.46124
RLTR9A3A#LTR/ERVK	361	160	0.35625	0.60564	0.1	0.415327	0	0	0.5125
MLTR18D_MM#LTR/ERVK	640	122	0.377049	0.570589	0.229508	0.501568	0	0	0.270492
MLTR18A_MM#LTR/ERVK	611	150	0.353333	0.607871	0.146667	0.330591	0	0	0.253333
RLTR31C_MM#LTR/ERVK	478	273	0.443223	0.474135	0.0915751	0.38428	0	0	0.252747
ERVB3_1-LTR_MM#LTR/ERVK	519	506	0.37747	0.549764	0.0790514	0.356307	0	0	0.387352
MLTR18_MM#LTR/ERVK	581	83	0.373494	0.554316	0.240964	0.417793	0	0	0.204819
RLTR30D2_MM#LTR/ERV1	664	333	0.336336	0.613057	0.162162	0.595119	0	0	0.384384
RLTR12BD_Mm#LTR/ERVK	431	108	0.416667	0.490143	0.157407	0.335055	0	0	0.351852
BC1_Mm#SINE/ID	152	466	0.506438	0.393469	0.259657	0.37349	172.888	255.158	0.259657
RLTR30E_MM#LTR/ERV1	548	226	0.327434	0.605688	0.168142	0.565143	0	0.35219	0.482301
RLTR11C_MM#LTR/ERVK	572	153	0.45098	0.426975	0.137255	0.383823	0	0	0.30719
B2_Mm1a#SINE/B2	193	53740	0.445795	0.427842	0.314886	0.417131	9472.16	7297.71	0.131764
B2_Mm1t#SINE/B2	193	59339	0.436998	0.433182	0.305415	0.420622	3564.35	2974.58	0.131718
ORR1A0#LTR/ERVL-MaLR	346	16305	0.277093	0.642167	0.164919	0.608938	635.575	1154.45	0.364183
ORR1A1#LTR/ERVL-MaLR	346	17489	0.277317	0.639525	0.165304	0.610329	216.465	262.98	0.361141
RLTR30C_MM#LTR/ERV1	500	192	0.302083	0.584074	0.0729167	0.492351	0	0.536	0.46875
B2_Mm2#SINE/B2	195	73827	0.396508	0.443403	0.27196	0.430446	2083.95	1872.35	0.134002
RLTR31D_MM#LTR/ERVK	427	134	0.298507	0.488192	0.0895522	0.416712	0	0	0.30597
RLTR51B_Mm#LTR/ERVK?	344	238	0.285714	0.497319	0.113445	0.473011	0	0	0.411765
RLTR35B_MM#LTR/ERVL	479	174	0.235632	0.52466	0.0804598	0.505518	0	0	0.350575
RLTR44-int_1550_1610#buffer	61	31	0.0967742	0.635658	0	0	0	0	0.451613
MMTV-int#LTR/ERVK	7253	48	0.0833333	0.548201	0	NaN	0	0	0.541667
IMPB_01#Satellite	2548	112	0.0625	0.381483	0.553571	0.393484	1.6927	1.74372	0
CENSAT_MC#Satellite/centromeric	60	1	0	NaN	0	NaN	0	34.9167	0
C573_MM#Other	522	1	0	NaN	0	NaN	2.75862	2.85057	0
